# Supplementary material
Source: PubMed Central journal article supplement (PMC7042887)
Supplement: jama-323-527-s004.pdf [file jama-323-527-s004.pdf]

## Data Sharing Statement

Tong. Effect of Vancomycin or Daptomycin With vs Without an Antistaphylococcal  $\beta$ -Lactam on Mortality, Bacteremia, Relapse, or Treatment Failure Among Patients With Methicillin-Resistant *Staphylococcus aureus* Bacteremia. *JAMA*. Published February 11, 2020. 10.1001/jama.2020.0103

### Data

**Data available:** No

### Additional Information

**Explanation for why data not available:** Data may be available on request in consultation with the Principal Investigators.
